# Supplementary material for: The effect of effort-reward imbalance on the health of childcare workers in Hamburg: a longitudinal study
Source: Springer Nature journal article supplement (doi:10.1186/s12995-017-0163-8), 2017-06-26
Supplement: MOESM1 [file 12477320]

Freiburg, 09.07.2015

Dear Peter Koch,

I herewith confirm the following:

Mr. Peter Koch has the permission to present unpublished data about personal burnout of child care workers of the German COPSOQ database.

Mean value for CBI, personal burnout is 48 point on a 0-100 scale, date:  
January 2013.

best regards  
Matthias Nübling

Dr. Mattias Nübling  
Head of COPSOQ studies Germany  
FFAW GmbH: Freiburg research centre for occupational sciences Bertoldstr. 63  
D- 79098 Freiburg  
T: 0049 (0)761 894421  
F: 0049 (0)761 83432  
M: 0046 (0)160 7868616  
[nuebling@ffaw.de](mailto:nuebling@ffaw.de)  
[www.ffaw.de](http://www.ffaw.de) [www.copsoq.de](http://www.copsoq.de)
